1

2 **Title: Distal axotomy enhances retrograde presynaptic excitability onto**  
3 **injured pyramidal neurons via trans-synaptic signaling**

4

5 **Authors:** Tharkika Nagendran<sup>1,3</sup>, Rebecca L. Bigler<sup>5</sup>, Rylan Larsen<sup>2,3</sup>,  
6 Benjamin D. Philpot<sup>2,3,4</sup>, Anne Marion Taylor<sup>1,3,4\*</sup>

7

8

9 **Affiliations:**

10 <sup>1</sup> UNC/NCSU Joint Department of Biomedical Engineering, UNC-Chapel Hill, Chapel  
11 Hill, NC 27599 USA

12 <sup>2</sup> Department of Cell Biology and Physiology, UNC-Chapel Hill, Chapel Hill, NC 27599  
13 USA

14 <sup>3</sup> Neuroscience Center, UNC-Chapel Hill, Chapel Hill, NC 27599 USA

15 <sup>4</sup> Carolina Institute for Developmental Disabilities, Chapel Hill, NC 27599 USA

16 <sup>5</sup> Curriculum in genetics and Molecular Biology Curriculum, UNC-Chapel Hill, Chapel  
17 Hill, NC 27599 USA

18 \*To whom correspondence should be addressed: [amtaylor@unc.edu](mailto:amtaylor@unc.edu)

19

20 **Abstract**

21 Distal injury of long pyramidal tracts remodels cortical circuitry and leads to enhanced  
22 neuronal excitability, thus influencing recovery following injury. The neuron-specific  
23 contributions to this retrograde injury-induced hyper-excitability remain unclear due to  
24 the complex cellular composition and connectivity of the CNS. We developed a novel  
25 microfluidics-based *in vitro* model system to examine intrinsic synaptic remodeling  
26 following distal axotomy of long projection pyramidal neurons. We found that distal  
27 axotomy of rat pyramidal neurons caused dendritic spine loss at synapses onto the injured  
28 neurons followed by a delayed and persistent retrograde trans-synaptic enhancement in  
29 presynaptic excitability. Further, this hyper-excitability involved the specific elimination  
30 of inhibitory presynaptic terminals formed onto dendritic spines. We found that these  
31 changes required differential gene expression and axotomy decreased mRNA expression  
32 of the secreted factor netrin-1 coinciding with spine loss. Exogenous netrin-1 applied two  
33 days after injury normalized this presynaptic hyper-excitability and restored the fraction  
34 of inhibitory inputs onto injured neurons. These findings provide new insights of neuron-  
35 specific mechanisms that contribute to synaptic remodeling and demonstrate a novel  
36 model system for studying the response of pyramidal circuitry to axotomy.

37

## 38 **Introduction**

39           Brain injury and stroke induce significant synaptic reorganization, even in remote  
40 uninjured cortical regions<sup>1-3</sup>. This enhanced neural plasticity allows formation of new  
41 connections and expansion of cortical territories, well-described in humans using fMRI  
42 and transcranial magnetic stimulation<sup>1, 2, 4, 5</sup>, yet the cellular mechanisms of this injury-  
43 induced plasticity remain largely unknown.

44           Long projection pyramidal neurons with somatodendritic domains housed in  
45 cortex extend axons into numerous distant areas of the CNS, including the spinal cord  
46 and apposing cortical hemispheres. When these remote areas are injured, pyramidal  
47 axons are damaged and injury signaling propagates retrogradely to their somatodendritic  
48 domains. Retrograde injury signal propagation leads to somatic responses such as  
49 chromatolysis and new transcription<sup>6, 7</sup>. After distal spinal cord injury where the  
50 corticospinal tract is damaged, spines on the somatodendritic domain of injured  
51 pyramidal neurons are lost in cortex<sup>4</sup>. Loss of local GABAergic inhibition also occurs at  
52 pyramidal somatodendritic regions following injury, which unmask preexisting  
53 excitatory connections and results in enhanced excitability<sup>2, 8, 9</sup>. These findings suggest  
54 that a cascade of events occurs following distal axonal injury involving retrograde axon-  
55 to-soma signaling and then trans-synaptic signaling from the injured neuron to uninjured  
56 presynaptic neurons causing synaptic changes and enhancing excitability.

57           Due to the heterogeneity and complexity of the CNS environment, intrinsic  
58 neuronal responses to distal axon injury and neuron-specific contributions to synaptic  
59 remodeling remain unclear. Reduced preparations are valuable for examining these  
60 neuron-specific responses and provide a more experimentally tractable model system to

61 identify and screen drugs to improve neuronal function following injury. Because brain  
62 injury and disease preferentially affects pyramidal neurons<sup>10, 11</sup>, we sought to determine  
63 the progression of events leading to trans-synaptic changes that occur intrinsically in  
64 these neurons following distal axotomy. We overcame the technical challenge of  
65 visualizing and manipulating highly polarized and specialized pyramidal neurons using a  
66 novel microfluidic approach. We found that distal axotomy of pyramidal neurons led to a  
67 delayed trans-synaptic enhancement of presynaptic excitability at synapses onto injured  
68 neurons that was transcription-dependent. Further, we identified a trans-synaptic  
69 signaling pathway that modulates this axotomy-induced neural plasticity.

70

## 71 **Results**

### 72 *In vitro model to study distal axon injury to pyramidal neurons*

73 To investigate how distal axon injury remodels synapses onto injured neurons, we  
74 used a microfluidic approach to compartmentalize pyramidal neurons and subjected them  
75 to distal axotomy ~1 mm away from their physically undisturbed dendrites and somata<sup>12,</sup>  
76 <sup>13</sup>. We used hippocampal neurons to obtain an enriched population of pyramidal neurons.  
77 To identify neurons with axons projecting into the axonal compartment, we retrogradely-  
78 labeled neurons by applying a G-deleted rabies virus (incompetent for trans-synaptic  
79 transfer) to the axonal compartment, and characterized the morphology of the labeled  
80 neurons. We found that these neurons were pyramidal (**Figure 1a,b**). Further,  
81 axotomized cultures showed no loss in viability post-axotomy (**Figure supplement 1**),  
82 similar to *in vivo* findings<sup>14</sup>, and injured axons regrew<sup>12, 13</sup>. Supporting the use of this *in*  
83 *vitro* approach, we previously found that axotomy performed within the microfluidic

84 chambers induced rapid expression of the immediate early gene *c-fos*<sup>13</sup> as also reported  
85 *in vivo*<sup>15</sup>. In addition, neurons labeled with retrograde tracer, Alexa 568-conjugated  
86 cholera toxin, showed a significant decrease in Nissl staining in the somata reflective of  
87 chromatolysis at 24 h post-axotomy<sup>16</sup> (**Figure supplement 1**). Together, this *in vitro*  
88 model recapitulated key features of axotomy *in vivo*, and allowed us to examine the  
89 response of injured pyramidal neurons far from the site of injury.

90

91 *Immature, thin spines are selectively lost after distal axon injury*

92 Spine loss is seen *in vivo* in models of traumatic brain injury and spinal cord  
93 injury<sup>17, 18</sup>. To determine whether similar structural changes occurred in cultured  
94 pyramidal neurons following distal axotomy, we quantified spine density within the  
95 somatodendritic compartment of axotomized neurons that were retrogradely labeled  
96 using rabies mCherry virus. Our data showed a significant decline in spine density 24 h  
97 and 48 h post-axotomy compared to before axotomy (**Figure 1d** and **Figure supplement**  
98 **2**). In contrast, control neurons had increased spine density as expected to occur during  
99 normal maturation (**Figure 1d and 2e**). We then analyzed specific spine types that were  
100 lost. We found a significant decrease in thin spines, but not stubby spines or mushroom  
101 spines, at 24 h post-axotomy compared to pre-axotomy (**Figure 1e**). Further, we found a  
102 significant loss of thin and mushroom spines 48 h post-axotomy, (**Figure 1d and 1e**).  
103 These results show that distal axon injury triggered persistent loss of thin spines over the  
104 course of two days in these neurons.

105

106 *A persistent enhancement in synaptic vesicle release rate follows distal injury*

107       To further evaluate how synapses are modified following distal axon injury, we  
108 next investigated whether presynaptic release properties were trans-synaptically altered at  
109 synapses onto injured neurons. To address this question we retrogradely infected neurons  
110 using a modified eGFP rabies virus to label injured neurons and then used FM dyes to  
111 optically measure synaptic vesicle release onto directly-injured neurons (**Figure 2a**). The  
112 use of FM dyes provided us with a non-selective, unbiased method to label a majority of  
113 presynaptic terminals within the somatodendritic compartment as described previously<sup>19</sup>.  
114 These FM puncta highly colocalized with synapsin1 immunolabeling (93%), validating  
115 our FM dye loading strategy (**Figure supplement 3**). We examined the synaptic vesicle  
116 release rate of FM puncta that colocalized with eGFP expressing neurons and found that  
117 at 24 h post-axotomy there was no measurable change in synaptic vesicle release rate  
118 compared to uninjured control samples (**Figure 2b,c**). In contrast, synaptic vesicle release  
119 rate was significantly enhanced 48 h after axotomy (**Figure 2c**) and persisted until 4 d  
120 post-axotomy. In addition, we found that the FM decay time constant,  $\tau$ , which has been  
121 inversely correlated with release probability<sup>20</sup> was significantly reduced at 48 h post-  
122 axotomy (control: 138.3 s  $\pm$  8.761 versus axotomy: 88.62 s  $\pm$  5.132; p<0.0001) and 4 d  
123 post-axotomy (control: 222.8 s  $\pm$  4.298 versus axotomy: 204.7 s  $\pm$  4.126; p=0.002). These  
124 results were similar to those obtained by examining the entire field of FM puncta rather  
125 than selecting only puncta that colocalize with eGFP expressing neurons (**Figure**  
126 **supplement 4**). Together, these data suggest a delayed and persistent increase in synaptic  
127 vesicle release rate that occurs following spine loss.

128 To reconcile our findings of axotomy-induced spine loss and increased  
129 presynaptic release, we wondered whether the fraction of responsive presynaptic  
130 terminals onto injured neurons increased following axotomy to enhance excitability even  
131 though fewer spines are present. We measured the proportion of FM puncta that unloaded  
132 (responsive) or did not unload (silent) in response to field stimulation using extracellular  
133 electrodes<sup>19</sup> (**Figure 2d**). At 24 h post-axotomy when spine density was decreased, we  
134 observed no change in the proportion of responsive and silent FM puncta compared to  
135 uninjured controls (**Figure 2d**). However at 48 h post-axotomy, a significantly increased  
136 proportion of puncta were responsive compared to uninjured control chambers (**Figure**  
137 **2d**), suggesting enhanced presynaptic excitability at this time point. Further, at 48 h post-  
138 axotomy we found a selective elimination of silent puncta following axotomy while the  
139 total number of responsive FM-labeled puncta remained the same (**Figure 2e**). Together,  
140 our data suggest that distal axon injury leads to a delayed enhancement in the fraction of  
141 responsive presynaptic terminals via the specific reduction of silent puncta.

142

#### 143 *Enhanced neurotransmitter release occurs at synapses onto injured neurons*

144 Our results suggest that distal axotomy triggers a retrograde cascade leading to  
145 enhanced presynaptic excitability. To confirm this, we performed electrophysiological  
146 recordings of AMPAR-mediated miniature excitatory postsynaptic currents (mEPSCs)  
147 from pyramidal neurons within the somatodendritic compartment 48 h post-axotomy  
148 compared with age-matched uninjured controls. We noticed a significant increase in  
149 mEPSC frequency in axotomized cultures, supporting an increased release rate (**Figure**  
150 **2f,g**). Membrane properties were equivalent between axotomized and uninjured control

151 neurons supporting the health of these axotomized neurons (**Table supplement 1**).  
152 Axotomized cultures also had significantly higher mEPSC amplitudes compared to  
153 uninjured controls (**Figure 2g**). This increase in mEPSC amplitude is consistent with our  
154 finding that distal axotomy preferentially reduces thin spines over larger-headed spines,  
155 which are known to contain more AMPARs <sup>21</sup>.

156         Pyramidal neurons extending into the axonal compartment make up 30-50% of  
157 neurons within the somatodendritic compartment near the microgrooves (data not  
158 shown); thus, not all of the neurons that we recorded were directly injured in the  
159 axotomized cultures. We identified whether recorded neurons extended into the axonal  
160 compartment by backfilling neurons with biocytin after performing the mEPSC  
161 recordings. This allowed us to ask whether the enhanced excitability of presynaptic  
162 inputs occurred specifically onto injured neurons. Indeed, our data showed that synapses  
163 onto directly injured neurons accounted for the changes in both mEPSC frequency and  
164 amplitude (**Figure 2h**), while neurons that did not extend into the axonal compartment  
165 were not significantly different between the conditions (**Figure 2j**). mEPSC frequency in  
166 directly injured neurons showed nearly a two-fold increase compared to the neurons that  
167 did not extend axons over to the axonal compartment. Further, these data demonstrate  
168 that directly injured neurons retrogradely influenced presynaptic neurotransmitter release  
169 through localized synaptic mechanisms that did not affect nearby synapses of uninjured  
170 neurons of which mEPSCs were unaffected.

171



172 *Axotomy selectively eliminates GABAergic terminals onto spines of injured neurons*

173 Our data show that distal axon injury preferentially eliminated presynaptically  
174 “silent” synapses. “Silent” or unresponsive presynaptic terminals may contain glutamate  
175 or GABA filled synaptic vesicles<sup>22,23</sup>, thus we next asked whether the eliminated puncta  
176 were primarily GABAergic or glutamatergic. We performed retrospective  
177 immunostaining to determine the identity of the lost terminals by quantifying the fraction  
178 of vGLUT or GAD67-positive FM puncta at 48 h post-axotomy. Interestingly, we found  
179 that axotomy did not alter the fraction of glutamatergic terminals (control:  $1.00 \pm 0.12$   
180 versus axotomy:  $1.073 \pm 0.10$ ; normalized to control), but significantly diminished the  
181 fraction of GAD67-positive puncta (Control:  $1.00 \pm 0.15$  versus axotomy:  $0.27 \pm 0.07$ ;  $p <$   
182  $0.05$ ; normalized to control) within the somatodendritic compartment. Thus our data  
183 suggest that distal axon injury induced a delayed enhancement in the fraction of  
184 responsive presynaptic terminals via a reduction in the number of inhibitory terminals  
185 onto injured neurons, and not the number of excitatory presynaptic terminals.

186 Although the majority of GABAergic synapses are found on dendritic shafts, a  
187 minor populations are also found on dendritic spines<sup>24,25</sup>. Inhibitory synapses formed on  
188 dendritic spines allow for compartmentalization of dendritic calcium levels involved in  
189 regulation of neuronal activity<sup>26,27</sup>. To investigate whether dendritic spines receiving  
190 inhibitory inputs (i.e., inhibited spines) are lost following axotomy, we quantified the  
191 number of inhibitory and excitatory presynaptic terminals onto spines of pyramidal  
192 neurons subjected to distal axotomy compared to uninjured controls using retrospective  
193 immunostaining for inhibitory (vGAT) and excitatory (vGLUT) synapse markers. We  
194 found no significant change in the fraction of vGLUT and vGAT-positive spines at 24 h

195 post-axotomy (**Figure 3**). However, we noticed a significant decrease in the fraction of  
196 vGAT-positive spines at 48h post-axotomy compared to uninjured control (**Figure 3a,c**)  
197 with no significant influence on glutamergic spines. Together, our data suggests that  
198 delayed loss of inhibitory synapses on injured neurons alters neuronal activity resulting in  
199 an enhancement in presynaptic excitability.

200

201 *Altered gene transcription mediates enhanced neurotransmitter release*

202 To determine whether injury-induced transcription is required for these trans-  
203 synaptic changes, we treated the somatodendritic compartment with the reversible  
204 transcriptional blocker, DRB, 15 min prior to axon injury and removed the drug 45  
205 minutes later. We found that blocking transcription during this brief time prevented  
206 significant changes in the proportion of responsive (**Figure 4b**). Also transcription  
207 blockade prevented changes in synaptic vesicle release rate 48 h post-axotomy (**Figure**  
208 **4c**). However, action potential blockade with TTX in the somatodendritic compartment  
209 for ~1 h at the time of injury did not affect injury-induced changes in presynaptic release  
210 or the proportion of responsive puncta (**Figure 4d-f**). Further, application of HBS or  
211 DMSO as respective vehicle controls to TTX or DRB treatments did not alter injury-  
212 induced increase in presynaptic release. We conclude that a transcriptional response is a  
213 critical mediator of the delayed trans-synaptic changes in presynaptic release properties  
214 following distal axon injury.

215

216 *Differential gene expression at 24 h post-axotomy*

217 Our data show that a transcriptional response was required immediately after  
218 axotomy to induce retrograde changes in synaptic vesicle release onto injured neurons.  
219 To identify genes that might mediate this process within a longer therapeutically relevant  
220 time window, we performed a gene expression study to identify differentially expressed  
221 transcripts within the somatodendritic compartment at 24 h post-axotomy compared to  
222 uninjured controls. We found 615 transcripts that were significantly changed following  
223 injury (one-way between-subject ANOVA,  $p < 0.05$ ) (**Figure 5a; table supplement 1**).  
224 Confirming that the transcription response *in vitro* recapitulated *in vivo* findings, we  
225 found Jun upregulated 1.41 fold in our microfluidic cultures 24 h post-axotomy<sup>14</sup>.

226

227 *Netrin-1 mRNA and DCC protein are down-regulated post-axotomy*

228 To identify potential trans-synaptic mediators that may influence synaptic vesicle  
229 release at synapses onto injured neurons, we focused on differentially expressed  
230 transcripts that are known to localize to cell-cell contacts, such as synapses (**Figure 5b**).  
231 Within this category only 6 transcripts were significantly changed. These transcripts  
232 included Podoplanin (Pdpn), Kinesin family member 26B (Kif26b), Cadherin 24 - type2  
233 (Cdh24), Myosin X (Myo10), Netrin1 (Ntn1) and Intercellular adhesion molecule2  
234 (Icam2). We found that netrin-1 was significantly downregulated in our microarray study  
235 and this was further confirmed by RNA-sequencing analysis of an additional set of  
236 axotomized and uninjured neurons harvested from microfluidic chambers (unpublished  
237 data). Netrin-1 is a secreted axon guidance and synaptogenic cue that is enriched at  
238 mature dendritic spines<sup>28</sup> and is known to induce synaptic DCC clustering and enhance

239 synapse maturation<sup>29</sup>. Further, loss of secretory or trophic factors are known to induce  
240 axotomy-like injury signals<sup>30</sup>. Because of the absence of suitable antibodies for  
241 performing netrin-1 immunofluorescence, we tested whether its receptor, DCC, was  
242 reduced following axotomy, as DCC levels parallel netrin-1 expression changes<sup>31,32</sup>.  
243 While overall expression levels of DCC throughout the somatodendritic compartment  
244 were unchanged, we found a significant decrease in local synaptic DCC  
245 immunofluorescence at spines of axotomized neurons at 48 h post-injury (**Figure 6b and**  
246 **c**). These data suggest that loss of netrin-1 in the somatodendritic compartment of  
247 axotomized neurons may contribute to the trans-synaptic changes in neurotransmitter  
248 release.

249

250 *Exogenous netrin-1 normalizes injury-induced enhancement in presynaptic excitability*

251 To determine if netrin-1 could normalize the injury-induced enhancement in  
252 excitability, we applied exogenous netrin-1 to the somatodendritic compartment 40 h  
253 after-injury and evaluated the resulting changes in synaptic vesicle release and  
254 responsiveness compared to vehicle control at 48 h after injury. We found that  
255 application of exogenous netrin-1 normalized synaptic DCC levels to that of uninjured  
256 controls (**Figure 6b and c**). Further, exogenous netrin-1 increased the total number of  
257 FM puncta at 48 h post-injury to levels found in the uninjured control (**Figure 6d**). We  
258 also observed that application of netrin-1 for 8 h was sufficient to normalize injury-  
259 induced changes in the percentage of responsive puncta (**Figure 6e**). Further, netrin-1  
260 treatment specifically led to the normalization of the number of silent and inhibitory  
261 boutons, GAD67-positive FM puncta, without significantly altering the number of

262 responsive or glutamatergic terminals, vGlut-positive FM puncta (**Figure 6f,g**). Together,  
263 our data suggests a novel role for netrin-1 in reducing injury-induced presynaptic hyper-  
264 excitability by restoring the excitatory/inhibitory balance.

265

## 266 **Discussion**

267 We developed a novel model system to examine intrinsic retrograde synaptic  
268 remodeling following axon injury that allows unique access to an enriched population of  
269 pyramidal neurons. Importantly, this *in vitro* model system recapitulates hallmarks of  
270 neurons subjected to axonal injury *in vivo*. These common hallmarks include  
271 chromatolysis<sup>6,16</sup>, retrograde spine loss<sup>4,17,18</sup>, retrograde hyper-excitability<sup>1-3</sup>, and  
272 disinhibition<sup>2,8,9</sup>. In addition, axotomy-induced transcriptional changes in this *in vitro*  
273 model are consistent with *in vivo* findings<sup>7,15</sup>. This *in vitro* model system provides a  
274 unique tool to examine axotomy-induced retrograde signaling intrinsic to neurons and  
275 the resulting effects to interneuronal communication because of the simplified cellular  
276 environment and unprecedented access to neurons for both measurements and  
277 manipulations. Our study shows for the first time how changes in intrinsic properties of  
278 injured neurons influences presynaptic excitability across cells. This highly reliable *in*  
279 *vitro* system will likely be of great benefit for both basic research and drug discovery.

280 Our data show that synapses formed specifically onto directly-injured neurons  
281 have altered neurotransmitter release properties. Synapses onto uninjured neurons did not  
282 have similar defects, suggesting that the trans-synaptic enhancement in excitability is  
283 localized at synapses forming onto injured-neuron during this time. Localized dendritic  
284 activity and activity-driven release of secreted proteins (e.g., BDNF, NT-3 and NT-4)

285 from dendrites can trans-synaptically regulate neurotransmitter release<sup>33,34</sup>. While the  
286 mechanisms that locally modulate neurotransmitter release remain unknown, netrin-1  
287 signaling presents at least one potential route. Netrin-1 is secreted locally from target  
288 cells and signals DCC receptors that are present along axons<sup>29</sup>, to influence presynaptic  
289 terminal formation and maturation<sup>35,36</sup>.

290 We found a significant reduction in the fraction of inhibitory terminals onto  
291 injured neurons 48h post-axotomy. This data together with the persistent loss in spine  
292 density post-axotomy, lead us to hypothesize that axotomy induces a specific loss of  
293 inhibited spines. Our data showed this was, indeed, the case. This finding is significant  
294 because it suggests a new role for the often-ignored inhibitory spines (~10% of spines in  
295 our cultures)<sup>24,25</sup>. It also suggests that excitatory inputs are spared at least for some time  
296 following axotomy. Specific loss of inhibitory and not excitatory terminals suggests that  
297 retracted excitatory inputs could form new connections while inhibitory ones disappear  
298 early after axotomy. It is also possible that large head dendritic spines could receive  
299 multiple excitatory inputs suggesting that these terminals are stable and could find new  
300 partners over time after injury.

301 Our results showing down-regulation of netrin-1 post-axotomy are consistent with  
302 *in vivo* findings following spinal cord injury<sup>37</sup>. Netrin-1 is known to enhance presynaptic  
303 terminal formation and maturation<sup>35,36</sup>, thus the loss of netrin-1 following distal injury  
304 may have an opposite effect, causing presynaptic terminals to become more functionally  
305 immature. Our data supports this conclusion, as we found that presynaptic inputs onto  
306 injured pyramidal neurons exhibited a reduced recycling synaptic vesicle pool size and  
307 increased release rate, both associated with immature terminals<sup>38,39</sup>. Further, we found

308 that application of exogenous netrin-1 normalizes the injury induced decrease in synaptic  
309 levels of DCC and the immature-like hyper-excitability (**Figure 6**). Since netrin-1 and  
310 DCC are enriched at glutamatergic synapses within the mature mammalian brain<sup>28</sup>, these  
311 results point to netrin-1 as a promising therapeutic target to address excitability post-  
312 injury. Other trans-synaptic signaling targets (**Figure 5b**) may also influence intrinsic  
313 neuronal excitability following brain injury and stroke. Our microfluidics-based model  
314 system provides a scalable platform to examine the influence of these and other targets on  
315 synaptic remodeling of pyramidal neurons following distal injury.

316

## 317 **Materials and Methods**

318 *Hippocampal cultures.* Dissociated hippocampal cultures were prepared from  
319 Sprague Dawley rat embryos (E17-E18) as previously described<sup>13, 19</sup> with the following  
320 modifications. Hippocampal tissue was dissected in dissociation media (DM) containing  
321 82 mM Na<sub>2</sub>SO<sub>4</sub>, 30 mM K<sub>2</sub>SO<sub>4</sub>, 5.8 mM MgCl<sub>2</sub>, 0.25 mM CaCl<sub>2</sub>, 1 mM HEPES, 20 mM  
322 Glucose and 0.001% Phenol red. For enzymatic digestion, equal volumes of TrypLE  
323 Express (Invitrogen) and DM were added to the tissue and incubated at 37°C for 8 min.  
324 Tissue was then rinsed and gently triturated in neuronal culture media consisting of  
325 Neurobasal media (Invitrogen) supplemented with 1x B27 (Invitrogen), 1x Antibiotic-  
326 antimycotic (Invitrogen), 1x Glutamax (Invitrogen). Dissociated cells were resuspended  
327 in neuronal culture media to yield 12x10<sup>6</sup> cells per ml.

328

329 *Microfluidic chambers.* Poly(dimethylsiloxane) (PDMS) microfluidic chambers  
330 were replica molded from microfabricated master molds as described previously<sup>13</sup>. All

331 experiments used chambers with 900  $\mu\text{m}$  long microgrooves to separate the  
332 somatodendritic and axonal compartments as described previously<sup>12, 13, 19</sup>. Microfluidic  
333 chambers were placed onto glass coverslips coated with 500-550 kDa Poly-D-Lysine  
334 (BD Biosciences). Approximately ~90,000 cells were plated into the somatodendritic  
335 compartment and axons extended into the adjacent axonal compartment after 5-7 days of  
336 culture. Axotomy was performed at 13 days in vitro (DIV) as described previously<sup>12, 13</sup>.

337

338 *Retrograde labeling.* Retrograde labeling was performed using either modified  
339 cholera toxin or rabies virus. Cholera Toxin Subunit B Alexa Fluor 488 or 568 (Life  
340 technologies, Molecular Probes; 1  $\mu\text{g}$  in 200 $\mu\text{l}$  of neuronal culture media) was added to  
341 the axonal compartment of the microfluidic chamber and incubated for ~ 15h at 37°C.  
342 After 15h of incubation, the axonal compartment media was removed, rinsed and  
343 replaced using fresh neuronal culture media before performing axotomy or imaging.

344 G-deleted Rabies-mCherry virus<sup>40</sup> (Salk Institute;  $1 \times 10^5$  viral units) in 50  $\mu\text{l}$ -  
345 conditioned media was added to the axonal compartment of each chamber and incubated  
346 for 2h at 37°C. Conditioned media was added back to the axonal compartments following  
347 two washes with fresh NBE media. Chambers were maintained in 37°C incubator for ~48  
348 h until mCherry expression was visible.

349

350 *Cell viability assay.* Dead cells were labeled using SYTOX Green (Invitrogen) at  
351 a final concentration of 1  $\mu\text{M}$  and all cell nuclei were labeled with NucBlue Hoechst  
352 Stain (Invitrogen). Cells were incubated with SYTOX/Hoechst solution simultaneously in  
353 1x PBS for 5 min at 37°C, washed with PBS, and fixed with 4% paraformaldehyde (PFA)



354 in PBS containing 40mg/ml sucrose, 1  $\mu$ M MgCl<sub>2</sub> and 0.1  $\mu$ M CaCl<sub>2</sub> for 15 min at room  
355 temperature (RT). Coverslips were then rinsed three times with PBS and mounted onto  
356 the glass slide using Fluoromount G (Southern Biotech). SYTOX positive (Sytox<sup>+</sup>) cells  
357 were manually counted in ImageJ using sum projected z-stack confocal images. Percent  
358 cell viability is calculated using  $[(\text{Sytox}^+ - \text{Hoechst}) / \text{Hoechst}] * 100$ .

359

360 *Nissl Staining.* Neuronal cultures retrogradely labeled with Cholera Toxin were  
361 either axotomized or left uninjured. PDMS chambers were carefully lifted off from PDL  
362 coated coverslips 24 h post-axotomy. Cultures on the coverslips were quickly rinsed  
363 twice with PBS, fixed with 4% PFA for 30 min at RT, washed twice in PBS, and  
364 incubated in 0.1% Triton X-100/PBS for 10 min at RT. Cultures were incubated for 20  
365 min in NeuroTrace 500/525 Green Fluorescent Nissl Stain (1:100; Invitrogen) and  
366 washed for 10 min in 0.1% Triton X-100/PBS. Cell nuclei were stained with DAPI  
367 (Sigma-Aldrich), rinsed three times in PBS, and then the coverslip was mounted onto a  
368 microscope slide using Fluoromount G.

369

370 *Immunocytochemistry.* PFA fixed neuronal cultures were permeabilized in 0.25%  
371 Triton X-100 and blocked in 10% normal goat serum for 15 min each. Coverslips were  
372 incubated with anti-GAD67 (1:2000; Aves labs, GAD), anti-vGLUT1 (1:100;  
373 NeuroMab), anti-vGAT (1:1000; Synaptic Systems), anti-DCC (1:100; Calbiochem), or  
374 anti-synapsin1 (1:500; Calbiochem) primary antibodies in 1% blocking solution for  
375 overnight at 4°C. Coverslips were then incubated with goat anti-rabbit or goat anti-  
376 mouse or anti-chicken secondary antibodies conjugated to Alexa-fluorophores (1:1000;

377 Invitrogen) for 1h at RT. Following PBS washes coverslips were mounted onto the glass  
378 slide.

379

380 *RNA isolation.* Total RNA from each of 3 axotomized devices and 3 sham  
381 manipulated devices (6 total samples) was isolated from the somatodendritic  
382 compartment of DIV14 cultures, 24 h after manipulation, using the RNAqueous-Micro  
383 Kit (Ambion) according to the manufactures instructions including DNase treatment,  
384 with modifications specific to accessing the microfluidic compartment<sup>12</sup>. Briefly, 50  $\mu$ l  
385 lysis solution was added to one somatodendritic well and collected from the other  
386 somatodendritic well. Lysate was added to 50  $\mu$ l of fresh lysis solution and mixed well  
387 by careful pipetting. Further RNA purification steps were performed according to  
388 the manufacturer's guidelines. Samples were maintained at -80°C until prepared for  
389 microarray gene expression.

390

391

392 *Microarray analysis.* Quantification of RNA integrity and concentration was  
393 confirmed with an Agilent TapeStation 2200 at the UNC Lineberger Comprehensive  
394 Cancer Center Genomics Core. Microarrays were processed at the UNC School of  
395 Medicine Functional Genomics Core using the Affymetrix GeneChip WT Plus Reagent  
396 Kit for cRNA amplification, cDNA synthesis, fragmenting and labeling. Samples were  
397 hybridized to Rat Gene 2.0 ST Arrays (Affymetrix). Data analysis was performed with  
398 Affymetrix Expression Console software and Affymetrix Transcriptome Analysis  
399 Console v2.0 software to compare axotomized cultures to uninjured control samples

400 using one-way between-subject ANOVA of normalized intensities. We defined our list of  
401 significantly changed transcripts as having a fold change absolute value  $\geq 1.1$  and an  
402 ANOVA p-value  $< 0.05$ . To further identified cell-cell adhesion transcripts by searching  
403 for the biological process gene ontology category ‘cell-cell adhesion’. Fold-change was  
404 calculated by dividing the mean  $\log_2$  intensity value of the uninjured control by the mean  
405  $\log_2$  intensity value of the axotomized culture samples. The microarray data will be  
406 submitted to GEO and accession numbers will be provided at the time of publication.

407

408 *Image acquisition and dendritic spine analysis.* High-resolution z-stack montages  
409 of mCherry labeled live (60x 1.2 NA water objective) and fixed (60x 1.3 NA silicon oil  
410 immersion objective) neurons were captured using Olympus IX81 microscope. To track  
411 axotomy induced changes, mCherry labeled 24 h post-axotomy cultures and those  
412 uninjured were fixed with 4% PFA for 30 min RT. Dendrite and spine measurements from  
413 montages of fixed (**Figure 2- figure supplement 1**) or live neurons were analyzed as  
414 described below. In live imaging, we captured “before axotomy” confocal z-stack images  
415 using a 60x objective to create montages of neurons extending axons into the axonal  
416 compartment. Axotomy was performed on the same day after acquiring these images.  
417 Images were acquired from same neuron 24 h post-axotomy. Calibrated z-stack montages  
418 were analyzed for all dendrite and spine parameters. Dendrites were traced  
419 using semiautomatic neurite tracing tool, Neuron J<sup>41, 42</sup>. Dendrites greater than 10  $\mu\text{m}$  in  
420 length were used in the analysis and were quantified for total dendrite length and number  
421 of branch points (total number of dendrites - number of primary dendrites). Number of  
422 spines on all dendritic segments of each neuron were manually labeled and categorized as

423 thin, stubby or mushroom shaped based on each spine's head to neck diameter ratio (neck  
424 ratio) and length to head diameter ratio using Neuron studio<sup>43</sup>. Spine density was  
425 calculated for 10  $\mu\text{m}$  length of dendrite as [(# of spines / total dendrite length)\*10].

426

427 *FM dye experiments and analysis.* Cultures in microfluidic chambers at 24 h  
428 (14DIV), 48 h (15DIV), and 4d (17DIV) post-axotomy were loaded with lipophilic dye  
429 FM<sup>®</sup> 5-95 (Invitrogen) using KCl mediated depolarization as described previously<sup>19</sup>.  
430 Briefly, culture were first incubated for 30 min with pre-warmed HEPES-buffered  
431 solution (HBS; 119 mM NaCl, 5 mM KCl, 2 mM CaCl<sub>2</sub>, 2 mM MgCl<sub>2</sub>, 30 mM glucose,  
432 10 mM HEPES). Media was then replaced with FM dye loading solution containing  
433 10  $\mu\text{M}$  FM 5-95, 20  $\mu\text{M}$  AMPAR antagonist 6-cyano-7-nitroquinoxaline-2,3-dione  
434 disodium (CNQX; Tocris), 50  $\mu\text{M}$  NMDAR antagonist D-(-)-2-amino-5-  
435 phosphonopentanoic acid (D-AP5; Tocris) in 90 mM KCl HBS for 1 min. The loading  
436 solution was replaced with HBS containing 10  $\mu\text{M}$  FM 5-95 for 1 min and later rinsed  
437 three times with a high-Mg<sup>2+</sup>, low-Ca<sup>2+</sup> solution (106 mM NaCl, 5 mM KCl, 0.5  
438 mM CaCl<sub>2</sub>, 10 mM MgCl<sub>2</sub>, 30 mM glucose, 10 mM HEPES) containing 1 mM Advasep-  
439 7 (Biotium) to remove extracellular membrane-bound FM. Finally, cultures were washed  
440 in HBS containing 20  $\mu\text{M}$  CNQX and 50  $\mu\text{M}$  D-AP5 for at least three times, 1 min each.  
441 Next, we stimulated the microfluidic chambers using extracellular electrodes by placing a  
442 positive and negative electrode in each well of the somatic compartment.

443 Electrical stimulation was provided by an AD Instrument 2 Channel Stimulus  
444 Generator (STG4002) in current mode with an asymmetric waveform (-480  $\mu\text{A}$  for 1 ms  
445 and +1600  $\mu\text{A}$  for 0.3 ms) for ~ 1 min at 20 hz for 600 pulses. Z-stacks (31 slices) were

446 captured every 15s. This stimulation pattern was optimized for efficient FM unloading  
447 within these microfluidic chambers and the frequency is greater than typically used in  
448 open well dishes. At least 3 baseline images were acquired before electrical  
449 stimulation. Sum projected confocal z-stack were converted to 8-bit images  
450 and registered using TurboReg, an image J plugin. We background subtracted the image  
451 stack using the image 3 min after stimulation. The image stack thresholded to a pixel  
452 value of 15. FM puncta between 2 to 50 (pixels<sup>2</sup>) were analyzed. We measured the  
453 intensity of each punctum in the whole field or specifically on GFP labeled neuron (**fig.**  
454 **3a-c**) throughout all time-series (registered stack obtained by TurboReg, imageJ plugin).  
455 To analyze the unloading kinetics of FM puncta on GFP labeled neuron, we first  
456 thresholded the GFP image and then created an outline enclosing all the GFP labeled  
457 regions including spines. The outlined ROI was superimposed on the FM labeled image  
458 and the intensity of each punctum in the selected ROI (GFP outline) was measured  
459 throughout all time series. We normalized fluorescent intensity of each puncta to the  
460 frame before stimulation. Puncta with >5% unloading after 1 min were used in the  
461 analysis as unloaded puncta. Time constants were estimated by curve fitting unloading  
462 kinetics to a single exponential decay function<sup>19</sup>. Curve fitting was done in MATLAB.  
463 Number of FM puncta that unload >5% after 60s were classified as responsive using  
464 image stacks that were not background subtracted; puncta that did not meet this criteria  
465 were classified as silent or unresponsive.

466 In activity and transcription blocking experiments, Tetrodotoxin citrate (TTX;  
467 Tocris Bioscience) was suspended in HBS and 5,6-dichloro-1- $\beta$ -D-ribofuranosyl-1H-  
468 benzimidazole (DRB; Sigma-Aldrich) was suspended in DMSO (**Figure 4**). The FM 5-95

469 unloading experiment was performed as mentioned above at 48 h post-axotomy. The  
470 intensity measurements of each punctum in the whole field and subsequent analysis of  
471 FM unloading kinetics was performed as mentioned above.

472

473 *Microscopy.* Images were captured using CSU-X1 spinning disk confocal imaging  
474 unit configured for an Olympus IX81 microscope (Andor Revolution XD). The FM 5-95  
475 imaging was performed as described previously<sup>19</sup>. Z-stack images were acquired every  
476 15s during the baseline (1 min), stimulation (1 min), and after stimulation (2 min)  
477 periods.

478

479 *mEPSCs Recordings.* AMPAR-mediated mEPSC recordings were performed  
480 similar to previously described<sup>44</sup>. For whole-cell recordings, neurons were visually  
481 identified with infrared differential interference contrast optics. Cells were recorded in  
482 voltage-clamp configuration at -70 mV with a patch clamp amplifier (Multiclamp 700A,  
483 Molecular Devices). Data were acquired and analyzed using pCLAMP 10 software  
484 (Molecular Devices). Series and input resistances were monitored throughout the  
485 experiments by measuring the response to a -5-mV step at the beginning of each sweep.  
486 Series resistance was calculated using the capacitive transient at the onset of the step and  
487 input resistance was calculated from the steady-state current during the step. Recordings  
488 were sampled at 10 kHz and bessel filtered at 2 kHz. No series resistance compensation  
489 was applied.

490 Microfluidic chambers, PDMS molds, were removed and the glass coverslips  
491 containing cells were mounted onto a submersion chamber, maintained at 32° C. Cultures

492 were perfused at 2 mL/min with artificial cerebrospinal fluid (ACSF) containing 124 mM  
493 NaCl, 3 mM KCl, 1.25 mM Na<sub>2</sub>PO<sub>4</sub>, 26 mM NaHCO<sub>3</sub>, 1 mM MgCl<sub>2</sub>, 2 mM CaCl<sub>2</sub> and  
494 20 mM d-(+)-glucose, saturated with 95% O<sub>2</sub>, 5% CO<sub>2</sub>. AMPAR-mediated mEPSCs  
495 were isolated by supplementing ACSF with TTX citrate (1 μM, Abcam), the GABA (A)  
496 receptor antagonist picrotoxin (50 μM, Sigma-aldrich), and the NMDA receptor  
497 antagonist D, L-2-amino-5 phosphonopentanoic acid (100 μM, AP5, Abcam). Open tip  
498 resistances were between 2-5 MΩ when pipettes were filled with internal solution  
499 containing: 100 mM CsCH<sub>3</sub>SO<sub>3</sub>, 15 mM CsCl, 2.5 mM MgCl<sub>2</sub>, 5 mM QX-314-Cl, 5 mM  
500 tetra-Cs-BAPTA, 10 mM HEPES, 4 mM Mg-ATP, 0.3 mM Na-GTP, and 0.5% (w/v)  
501 neurobiotin with pH adjusted to 7.25 with 1 M KOH and osmolarity adjusted to ~295  
502 mOsm with sucrose. To determine if recorded neurons' axons entered the microfluidic  
503 chamber, 0.035 Alexa-594 was also included in the internal solution to allow for post-hoc  
504 visualization of neuronal morphology.

505 Events with a rapid rise time and exponential decay were identified as mEPSCs  
506 using an automatic detection template in pCLAMP 10, based on previously published  
507 methods<sup>45</sup>. Events were post-hoc filtered to only include events with a peak amplitude  
508 ≥5 pA and a ≤3 ms 10-90% rise time. Mean mEPSC parameters were quantified from a  
509 10 min recording period. Neurons were excluded from analysis if R<sub>series</sub> was ever >20  
510 MΩ during anytime during the recording.

511

512 *Statistics.* Graphpad prism 6 statistical program was used. For calculating  
513 significance on spine density in live imaging data, paired two-tailed t-test was performed.  
514 Unpaired two-tailed t-test was performed when comparing two groups. For FM

515 unloading experiments and for comparing multiple groups, Two-way ANOVA and One-  
516 way ANOVA were used respectively followed by Bonferroni post-hoc test.

517

518 **References:**

- 519 1. Nudo, R.J. *Front Hum Neurosci* 7, 887 (2013).
- 520 2. Takechi, U., *et al. Clin Neurophysiol* 125, 2055-2069 (2014).
- 521 3. Nudo, R.J. & Milliken, G.W. *J Neurophysiol* 75, 2144-2149 (1996).
- 522 4. Oudega, M. & Perez, M.A. *J Physiol* 590, 3647-3663 (2012).
- 523 5. Frost, S.B., *et al. J Neurophysiol* 89, 3205-3214 (2003).
- 524 6. Rishal, I. & Fainzilber, M. *Nat Rev Neurosci* 15, 32-42 (2014).
- 525 7. Urban, E.T., 3rd, *et al. Molecular and cellular biochemistry* 369, 267-286 (2012).
- 526 8. Jacobs, K.M. & Donoghue, J.P. *Science* 251, 944-947 (1991).
- 527 9. Ding, M.C., *et al. J Neurosci* 31, 14085-14094 (2011).
- 528 10. Nakatomi, H., *et al. Cell* 110, 429-441 (2002).
- 529 11. Will, B., *et al. Progress in Neurobiology* 72, 167-182 (2004).
- 530 12. Taylor, A.M., *et al. J Neurosci* 29, 4697-4707 (2009).
- 531 13. Taylor, A.M., *et al. Nat Methods* 2, 599-605 (2005).
- 532 14. Greer, J.E., *et al. J Neurosci* 32, 6682-6687 (2012).
- 533 15. Ikeda, S. & Nakagawa, S. *Brain Res* 792, 164-167 (1998).
- 534 16. McIlwain, D.L. & Hoke, V.B. *BMC Neurosci* 6, 19 (2005).



- 535 17. Ghosh, A., *et al.* *Cereb Cortex* 22, 1309-1317 (2012).
- 536 18. Gao, X., *et al.* *PLoS One* 6, e24566 (2011).
- 537 19. Taylor, A.M., *et al.* *J Neurosci* 33, 5584-5589 (2013).
- 538 20. Zakharenko, S.S., *et al.* *Nat Neurosci* 4, 711-717 (2001).
- 539 21. Matsuzaki, M., *et al.* *Nat Neurosci* 4, 1086-1092 (2001).
- 540 22. Li, P. & Zhuo, M. *Nature* 393, 695-698 (1998).
- 541 23. Bekkers, J.M. *J Neurosci* 25, 4031-4039 (2005).
- 542 24. Chen, J.L., *et al.* *Neuron* 74, 361-373 (2012).
- 543 25. Markram, H., *et al.* *Nat Rev Neurosci* 5, 793-807 (2004).
- 544 26. Chiu, C.Q., *et al.* *Science* 340, 759-762 (2013).
- 545 27. Higley, M.J. *Nat Rev Neurosci* 15, 567-572 (2014).
- 546 28. Horn, K.E., *et al.* *Cell Rep* 3, 173-185 (2013).
- 547 29. Goldman, J.S., *et al.* *J Neurosci* 33, 17278-17289 (2013).
- 548 30. Shadiack, A.M., *et al.* *J Neurosci* 21, 363-371 (2001).
- 549 31. Xu, K., *et al.* *Science* 344, 1275-1279 (2014).
- 550 32. Manitt, C., *et al.* *J Neurosci* 29, 11065-11077 (2009).
- 551 33. Wong, Y.C. & Holzbaur, E.L. *J Neurosci* 34, 1293-1305 (2014).
- 552 34. Branco, T., *et al.* *Neuron* 59, 475-485 (2008).
- 553 35. Stavoe, A.K. & Colon-Ramos, D.A. *The Journal of Cell Biology* 197, 75-88
- 554 (2012).

- 555 36. Colon-Ramos, D.A., *et al.* *Science* 318, 103-106 (2007).
- 556 37. Manitt, C., *et al.* *J Neurosci Res* 84, 1808-1820 (2006).
- 557 38. Blue, M.E. & Parnavelas, J.G. *Journal of neurocytology* 12, 697-712 (1983).
- 558 39. Bolshakov, V.Y. & Siegelbaum, S.A. *Science* 269, 1730-1734 (1995).
- 559 40. Wickersham, I.R., *et al.* *Neuron* 53, 639-647 (2007).
- 560 41. Fu, M.M. & Holzbaur, E.L. *Autophagy* 10, 2079-2081 (2014).
- 561 42. Nagendran, T. & Hardy, L.R. *Neuroscience* 199, 548-562 (2011).
- 562 43. Rodriguez, A., *et al.* *PLoS One* 3, e1997 (2008).
- 563 44. Larsen, R.S., *et al.* *Neuron* 83, 879-893 (2014).
- 564 45. Clements, J.D. & Bekkers, J.M. *Biophys J* 73, 220-229 (1997).
- 565
- 566 **Acknowledgements:** We thank Stephanie Gupton for netrin-1, Kelly Carstens for
- 567 preliminary gene expression work, and Cassie Meeker for technical support. We thank
- 568 Randolph Nudo (KUMC), Richard Segal (MUSC), Julius Dewald (RIC) and Taylor lab
- 569 members for their advice and discussions. **Funding:** R.L.B. was supported in part by a
- 570 grant from the National Institute of General Medical Sciences under award 5T32
- 571 GM007092. A.M.T. acknowledges support from the Eunice Kennedy Shriver NICHD
- 572 (K12HD073945) and the NIMH (R41MH097377). A.M.T. is an Alfred P. Sloan
- 573 Research Fellow. **Author contributions:** T.N. designed and performed experiments and
- 574 wrote the manuscript. R.L.B. designed and performed experiments. R.L. designed and
- 575 performed experiments. B.D.P. designed experiments. A.M.T. designed experiments and

576 wrote the manuscript. **Competing financial interests:** Yes there is potential competing  
577 interest. A.M.T. is an inventor of the microfluidic chambers (US 7419822 B2) and has  
578 financial interest in Xona Microfluidics, LLC. T.N., R.B., R.L., and B.D.P. declare no  
579 competing financial interests.

580

581 **Figure 1: Distal axotomy of pyramidal neurons within microfluidic chambers**  
582 **induces dendritic spine loss on axotomized neurons.** (a) 14 DIV rat hippocampal  
583 neurons cultured within a microfluidic chamber. Neurons are retrogradely labeled using a  
584 G-deleted rabies mCherry virus added exclusively to the axonal compartment. (b) The  
585 virally-labeled neurons are pyramidal neurons (94%; 42 of 45 were pyramidal; remaining  
586 were unclassifiable). G-deleted rabies mCherry virus labels entire dendritic arbor  
587 including spines (Insert). Scale bars, 100  $\mu\text{m}$ . (c) Cartoon illustration of *in vitro* axotomy  
588 within microfluidic chambers which axotomizes a subset of neurons (red) that extend  
589 their axons through the microgrooves. Axons of uninjured neurons (grey) are housed  
590 within the somatodendritic compartment. (d) Representative images of dendritic  
591 segments, retrogradely labeled with G-deleted rabies-mCherry virus, from repeated live  
592 imaging of mock injured control and axotomized neurons before and 24 h post-axotomy.  
593 Scale bars, 10  $\mu\text{m}$ . Quantification of spine density in live uninjured controls, 24 h post-  
594 axotomy and 48 h post-axotomy. Two-tailed t-test,  $^{**}p \leq 0.01$ . (e) Distribution of spine  
595 categories in live uninjured controls (before: black open bars; 24 h after: black solid  
596 bars), 24 h post-axotomy (before; blue open bars; 24 h after: blue solid bars) and 48 h  
597 post-axotomy (before; red open bars; 48 h after: red solid bars). Two-way ANOVA,  
598 Bonferroni post hoc test, \*  $p < 0.05$ , \*\*  $p < 0.01$ , \*\*\*  $p < 0.001$ ;  $n=6$  live neurons per  
599 condition from two independent experiments. The same trend was observed in each  
600 independent experiment. Error bars, SEM.

601

602

603

604 **Figure 2: Distal axotomy induces a delayed trans-synaptic increase in presynaptic-**  
605 **excitability onto axotomized neurons.**

606 (a) Representative image of a neuron retrogradely labeled with a modified eGFP rabies  
607 virus, within the somatodendritic compartment of a microfluidic chamber. An enlarged  
608 region shows colocalization of FM puncta with eGFP-labeled dendrites and dendritic  
609 spines (arrows). FM puncta were visualized using the ImageJ ‘fire’ color look up table  
610 shown in (b). Scale bars, 20  $\mu\text{m}$ . (b) Representative images show FM puncta before and  
611 after field stimulation. Boundaries of eGFP labeled dendrites and spines are outlined as  
612 gray dashed lines. Arrows in the before and after stimulation images indicate destaining  
613 of FM labeled puncta in the dendritic spines. The ImageJ color look up table ‘fire’ was  
614 used. Scale bars, 10  $\mu\text{m}$ . (c) FM unloading curves from FM puncta colocalized onto GFP  
615 labeled neurons at 24 h (control, n=125 puncta combined from 3 chambers; axotomy,  
616 n=156 puncta combined from 3 chambers) and 48 h post-axotomy (control, n=150 puncta  
617 combined from 3 chambers; axotomy, n=200 puncta combined from 3 chambers). Two-  
618 way ANOVA, \*\*\* $p \leq 0.001$ . Insert: decay time constant ( $\tau$ ) of FM puncta at 24 h and 48  
619 h post-axotomy. Two-tailed t-test, \*\*\* $p < 0.001$ . Data shown represent two independent  
620 experiments. (d) Percent of responsive FM puncta and silent FM puncta at 24 h (control,  
621 n=1,431; axotomy, n=1,602; data shown is from two independent experiments which  
622 includes a total of 4 chambers for each condition) and 48 h post-axotomy (control,  
623 n=3,452; axotomy, n=2,793; data shown is from three independent experiments to yield a  
624 combined 7 chambers for each condition). Asterisks indicate that the percentage of  
625 responsive and silent puncta at 48 h post-axotomy is significantly different from control.  
626 Two-tailed t-test, \* $p < 0.05$ . (e) Total number of responsive and silent FM puncta at 48 h

627 post-axotomy (Responsive: control, n=1,536; axotomy, n=1,522; Silent: control,  
628 n=1,504; axotomy, n=742; data shown represents three independent experiments which  
629 combined included 6 chambers for each condition) Two-tailed t-test, \*p< 0.05. **(f)**  
630 Representative traces of mEPSC recordings 48 h post-axotomy. **(g)** Quantification of  
631 mEPSC frequency and amplitude at 48 h post-axotomy (control, n=17 neurons; axotomy,  
632 n=16 neurons). Data shown are combined from three independent experiments. **(h.i)**  
633 Subset analysis of mEPSC frequency and amplitude for neurons from (g) that extended  
634 axons (*h*; control, n=7 neurons; axotomy, n=9 neurons) or did not extend axons into the  
635 axonal compartment (*i*; control, n=10 neurons; axotomy, n=7 neurons). Insert: Cartoon  
636 depicts recording from either directly injured neuron (*h*; red) or its neighboring uninjured  
637 neuron (*i*; grey). Error bars, SEM. One-tailed t-test, \*p< 0.05. The same trend was  
638 observed in each independent experiment described above.  
639  
640

641 **Figure 3: Distal axotomy induces selective loss of inhibited spine synapses onto**  
642 **injured neurons.**

643 (a) Representative dendritic segments (retrogradely labeled with GFP) showing spines  
644 that are labeled with either vGLUT (red) or vGAT (purple) antibodies. White open circles  
645 highlight dendritic spines with vGLUT and/or vGAT synapses. (b) Fraction of vGlut  
646 positive dendritic spines at 24 h and 48 h post-axotomy normalized to respective controls.  
647 (c) Fraction of vGAT positive dendritic spines at 24 h and 48 h post-axotomy normalized  
648 to respective controls. 8 individual fields were analyzed per condition from two  
649 independent experiments. The same trend was observed in each experiment. Scale bars, 5  
650  $\mu\text{m}$ . Two-tailed t-test, \*\*\* $p \leq 0.001$ . Error bars, SEM.

651

652

653 **Figure 4: Injury-induced gene transcription is required for enhanced synaptic**  
654 **vesicle release following axotomy.**

655 (a) Experimental timeline illustrating application of transcription blocker (DRB, 80  $\mu$ M)  
656 to the somatodendritic compartment for 1 h prior to and during injury. (b) Percent of  
657 unloaded FM puncta (responsive) and unresponsive (silent) puncta at 48 h post-axotomy.  
658 Approximately 300 puncta were analyzed per chamber; 4 individual chambers were  
659 analyzed per condition over two independent experiments. (c) FM5-95 unloading  
660 following application of DRB. Approximately 200 puncta were analyzed per chamber; 4  
661 individual chambers were analyzed per condition over two independent experiments. (d)  
662 Experimental timeline illustrating application of action potential blocker (TTX, 1  $\mu$ M) to  
663 the somatodendritic compartment prior to and during injury. (e) Percent of unloaded FM  
664 puncta (responsive) and unresponsive (silent) puncta at 48 h post-axotomy.  
665 Approximately 400 puncta were analyzed per chamber; 4 individual chambers were  
666 analyzed for each condition over two independent experiments. Asterisks indicate that the  
667 percentage of responsive and silent puncta is significantly different compared to control.  
668 Two-tailed t-test, \* $p < 0.05$ . (f) FM5-95 unloading curves following application of TTX.  
669 Approximately 200 puncta were analyzed per chamber; 4 individual chambers were  
670 analyzed for each condition over two independent experiments). The same trend was  
671 observed in each pair of experiments. Two-tailed t-test, \*\* $p < 0.01$ . Error bars, SEM.  
672



673 **Figure 5: Differentially expressed transcripts that are critical for synaptic function,**  
674 **are altered in the somatodendritic compartment of axotomized neurons.**

675 Microarray analysis was performed on somatodendritic samples of controls and 24 h  
676 post-axotomy cultures. (A) Volcano plot showing differentially expressed RNAs that are  
677 significantly changed at 24 h post-axotomy (p-value < 0.05; n = 3 individual chambers  
678 each condition; **Table supplement 2**). (B) Volcano plot showing differential expression  
679 of transcripts from Gene Ontology biological process category “cell-cell adhesion”. Only  
680 6 transcripts are significantly changed in this category. Netrin-1 regulates trans-synaptic  
681 effects and is significantly down regulated 24 h post-axotomy. One-way ANOVA, p-  
682 value < 0.05 represents the transcripts that are consistently changed in each of the three  
683 microarray datasets.

684

685

686 **Figure 6: Netrin-1 treatment normalizes presynaptic hyper-excitability and**  
687 **inhibitory fraction following distal axotomy.**

688 (a) Experimental timeline. (b) Representative images of fixed dendritic segments,  
689 retrogradely labeled with G-deleted rabies-mCherry virus and immunostained with DCC  
690 antibody following exogenous netrin-1 (625ng/ml) treatment. Regions of interest (ROI's;  
691 white circles) show synaptic DCC levels at 48 h post-axotomy. Scale bar, 10 $\mu$ m. (c)  
692 Quantification of DCC fluorescence intensity at 48 h post-axotomy and in response to  
693 exogenous application of netrin-1 (control, n=185 ROIs; axotomy, n=165 ROIs; axotomy  
694 + netrin-1, n=100 ROIs). At least 4 individual chambers were analyzed per condition  
695 from two independent experiments. The same trend was observed in each independent  
696 experiment. Two-way ANOVA, Bonferroni post hoc test, \*\*\*p < 0.001. (d) Average  
697 number of responsive and silent FM puncta per field in response to exogenous  
698 application of netrin-1 48 h post-axotomy. Approximately 400 puncta were analyzed per  
699 chamber from 7 individual chambers for each condition. Data shown was from two  
700 independent experiments and a similar trend was observed in each these experiment.

701 One-way ANOVA, Bonferroni post hoc test, \*p < 0.05. Noticeably, injury decreased the  
702 number of silent FM puncta that was normalized in response to exogenous application of  
703 netrin-1 48 h post-axotomy. (e) The percent of responsive FM puncta (unloaded puncta)  
704 following exogenous application of netrin-1 48 h post-axotomy. Two-tailed t-test, \*p <  
705 0.05. (f) Fraction of vGlut1-positive FM puncta following exogenous netrin-1  
706 application, normalized to vehicle (HBS) controls. (g) Fraction of GAD67-positive FM  
707 puncta following exogenous netrin-1 application, normalized to vehicle (HBS) controls.  
708 (f,g) A minimum of 1000 puncta from 6 individual fields was analyzed per condition

709 over two experiments. The same trend was observed in each independent experiment.

710 Two-tailed t-test, \* $p < 0.05$ . Error bars, SEM.

711 **Supplemental figures and tables:**

712 **Figure supplement 1:** Distal axotomy of pyramidal neurons induces dissolution of Nissl  
713 substance without affecting cell viability.

714 **Figure supplement 2:** Dendrites retract, show fewer branch points and spines 24 h post-  
715 axotomy compared to uninjured controls.

716 **Figure supplement 3:** FM puncta highly colocalizes with synapsin1 labeling.

717 **Figure supplement 4:** FM unloading curves from somatodendritic compartments of  
718 microfluidic chambers without rabies virus infection.

719 **Table supplement 1:** Membrane properties of uninjured controls vs. axotomized neurons  
720 48 h post-axotomy.

721 **Table supplement 2:** List of transcripts that were significantly changed 24 h after injury.

722

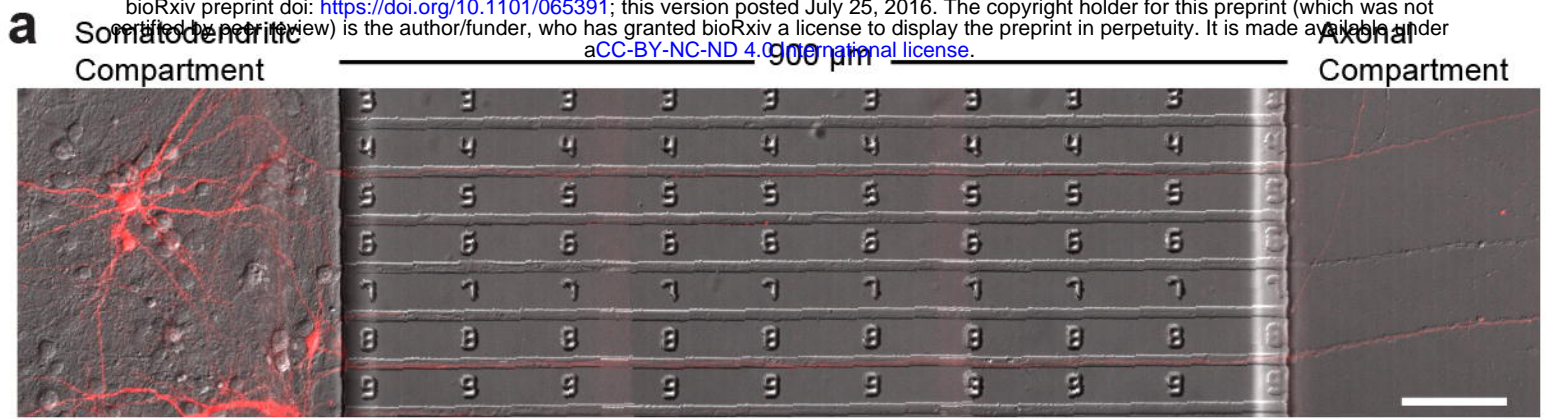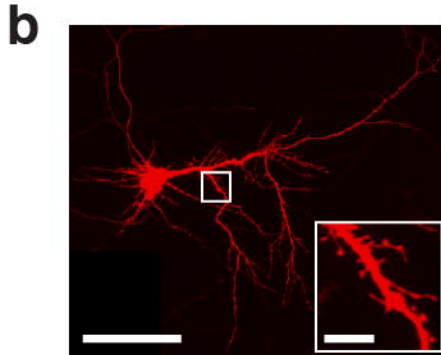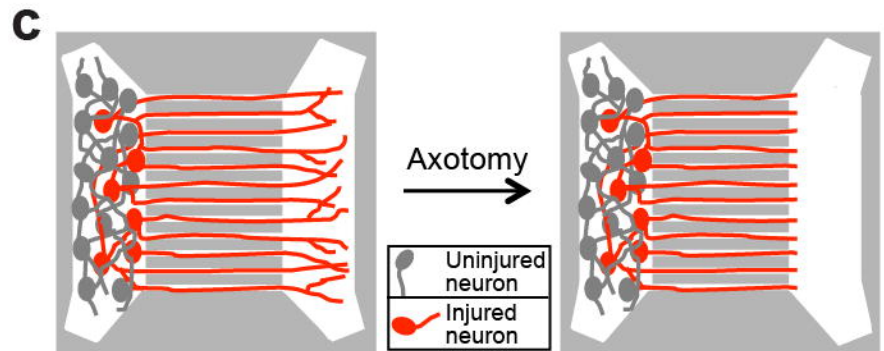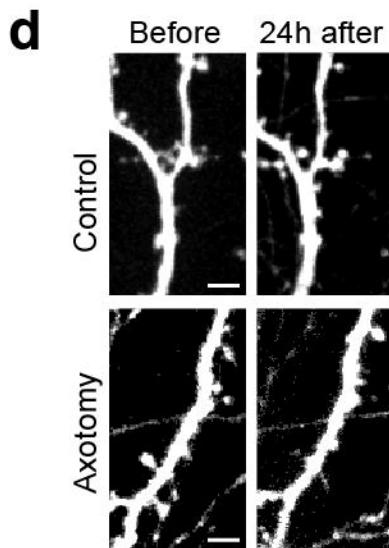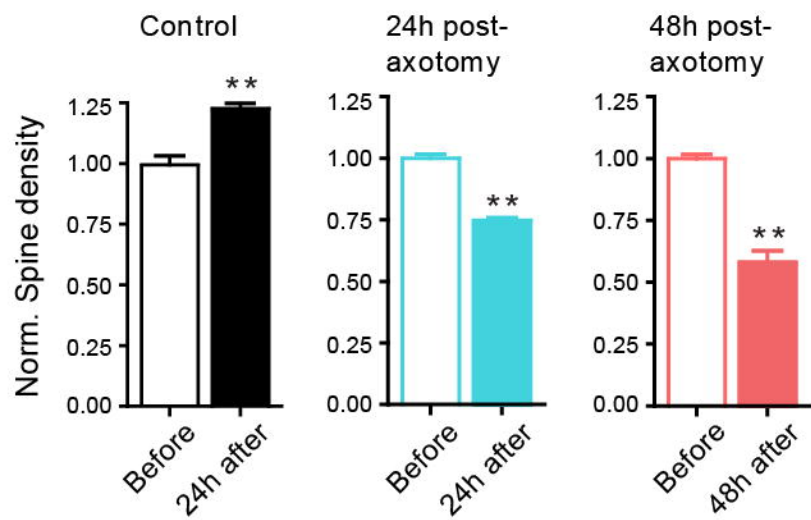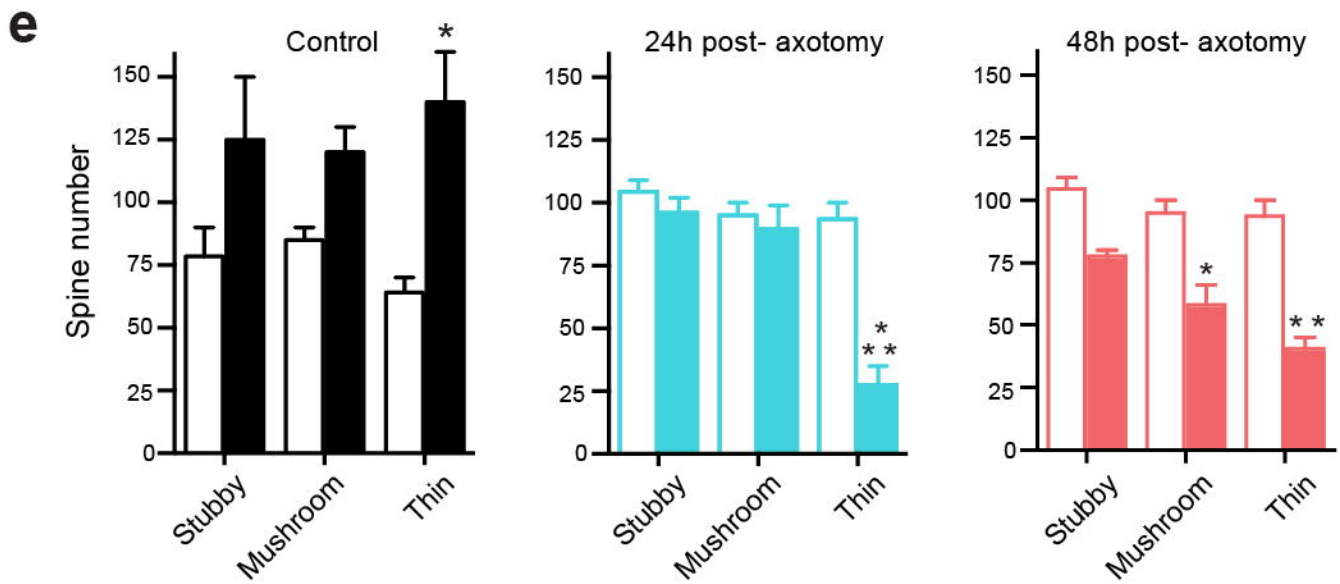

Fig. 1



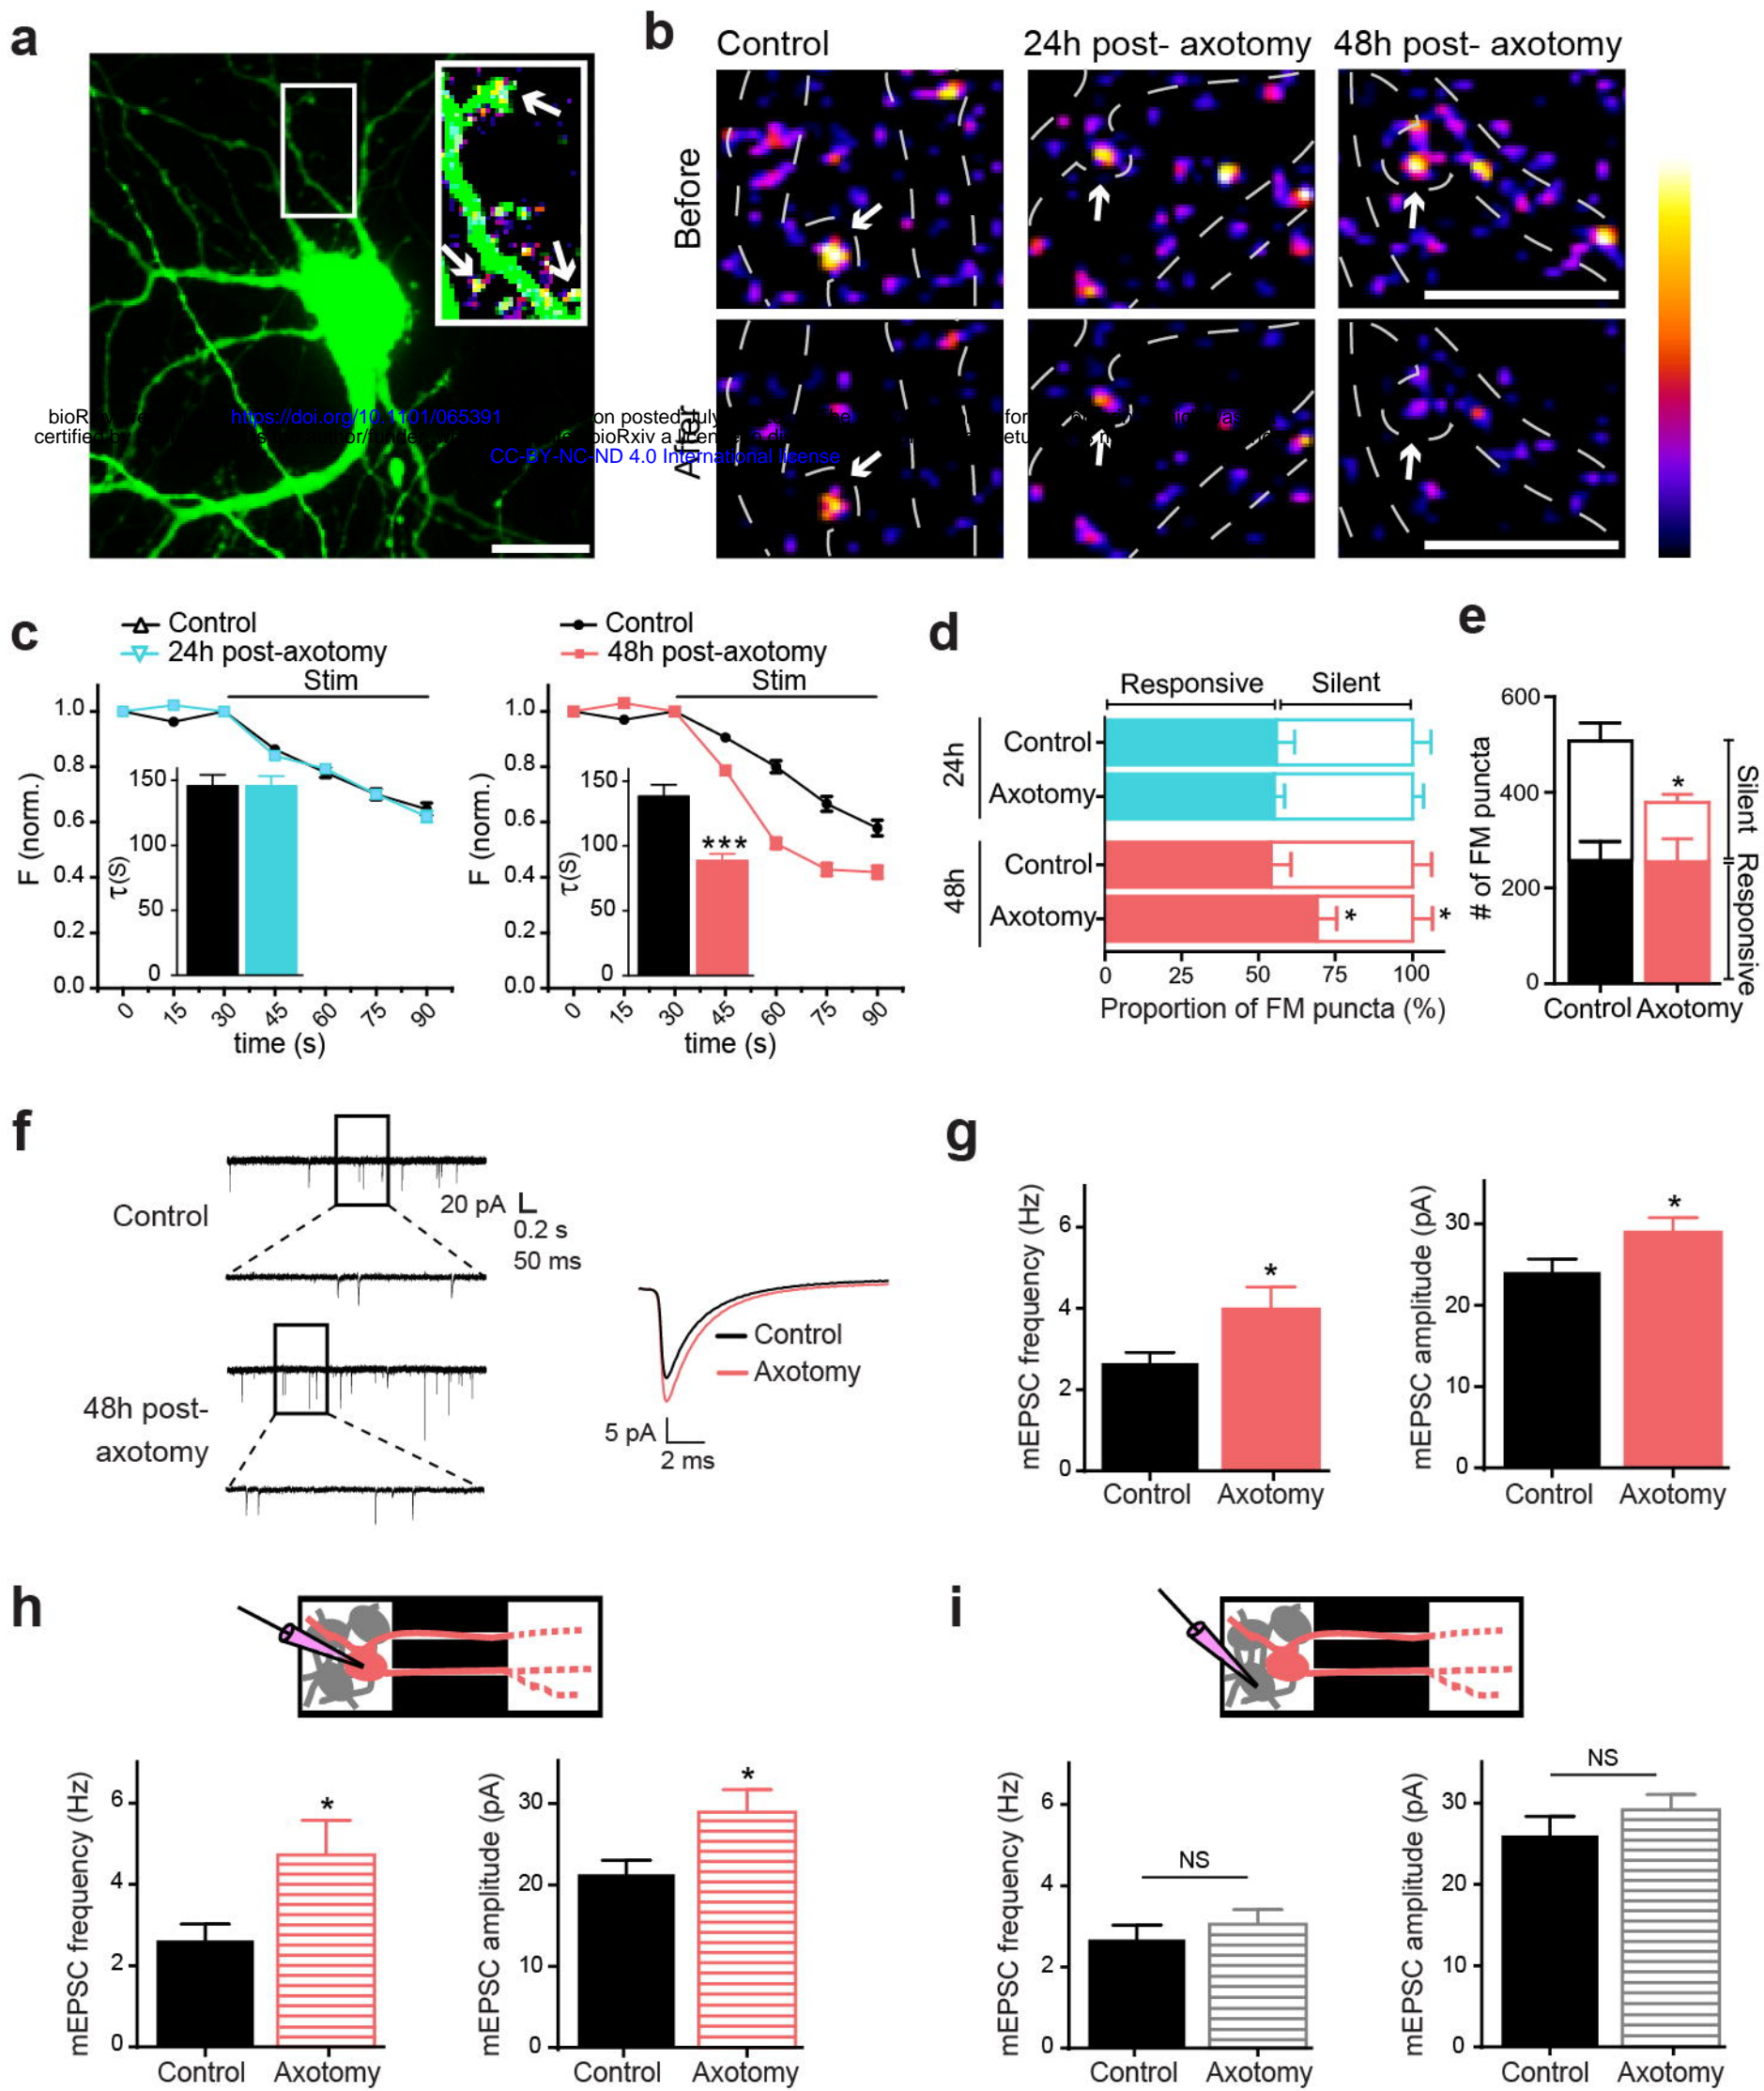

Fig. 2

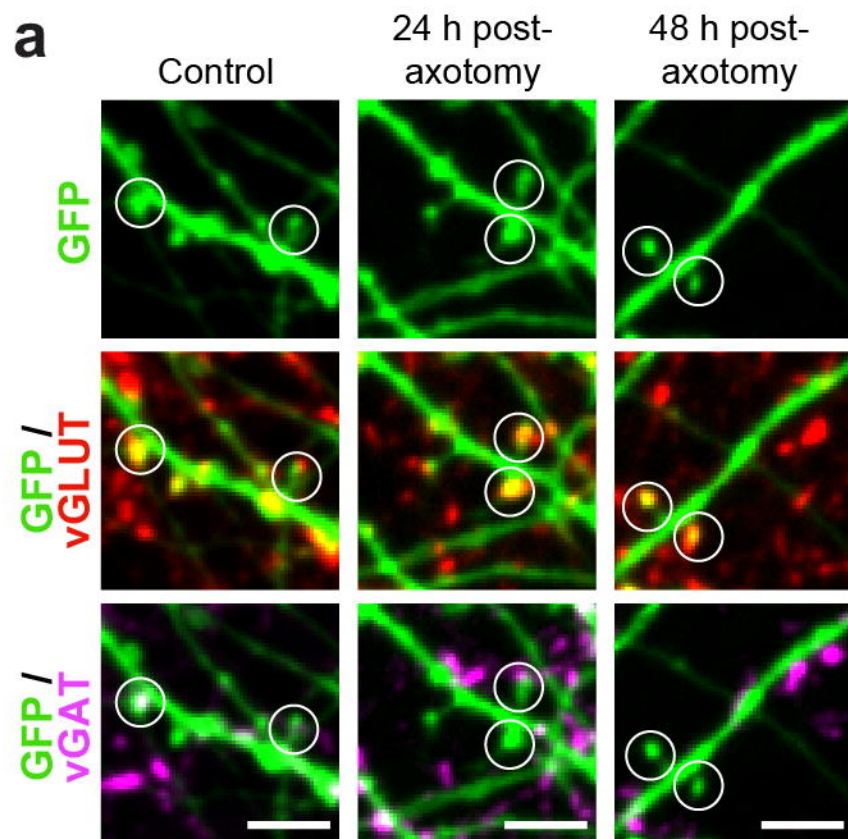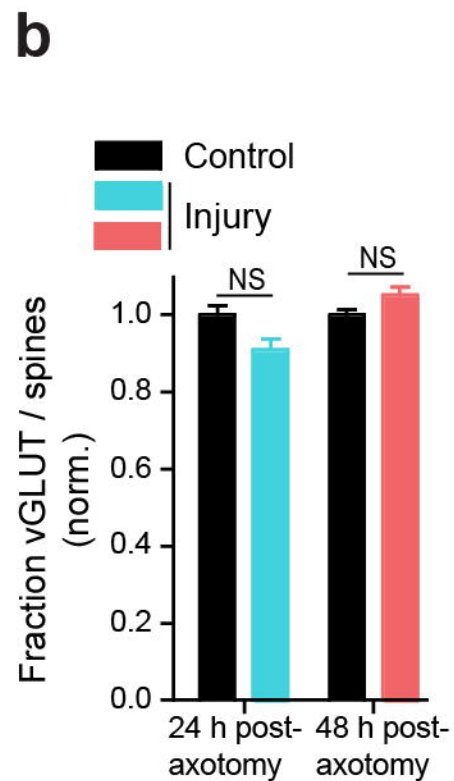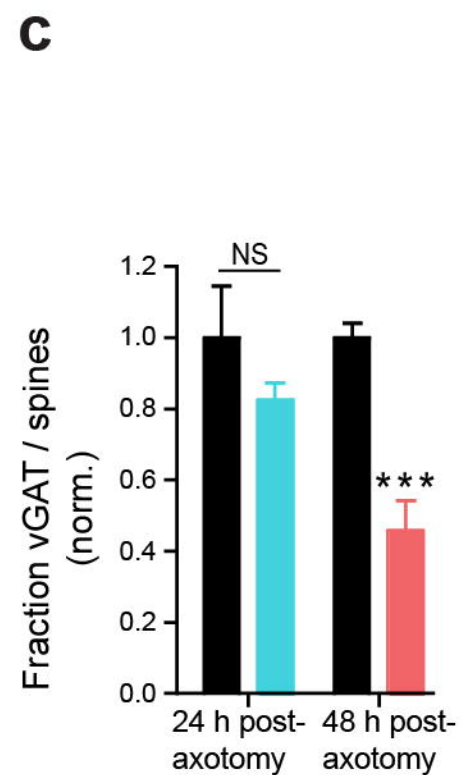

Fig. 3

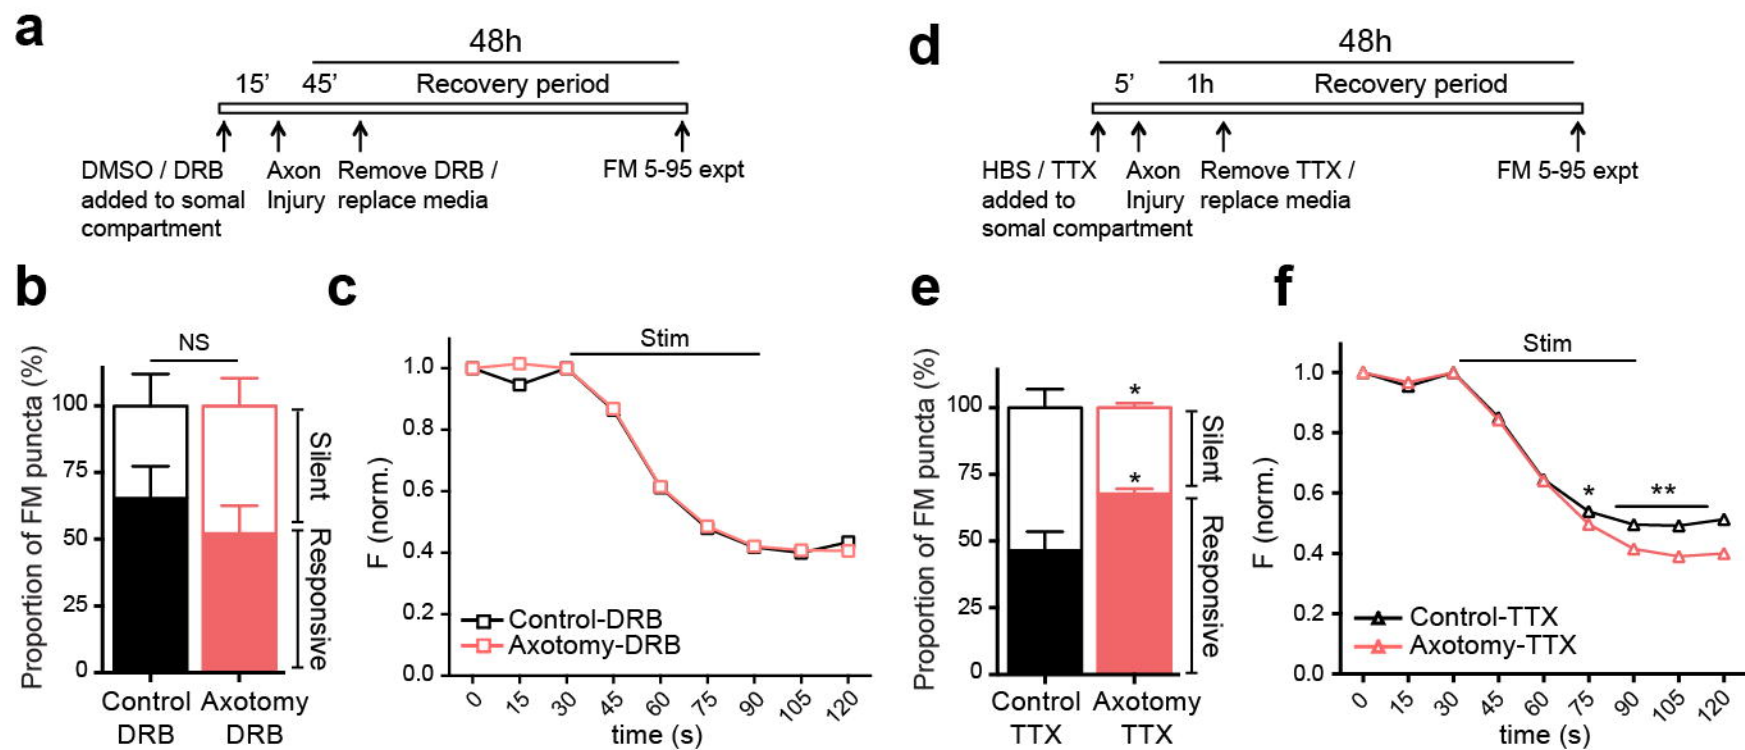

Fig. 4



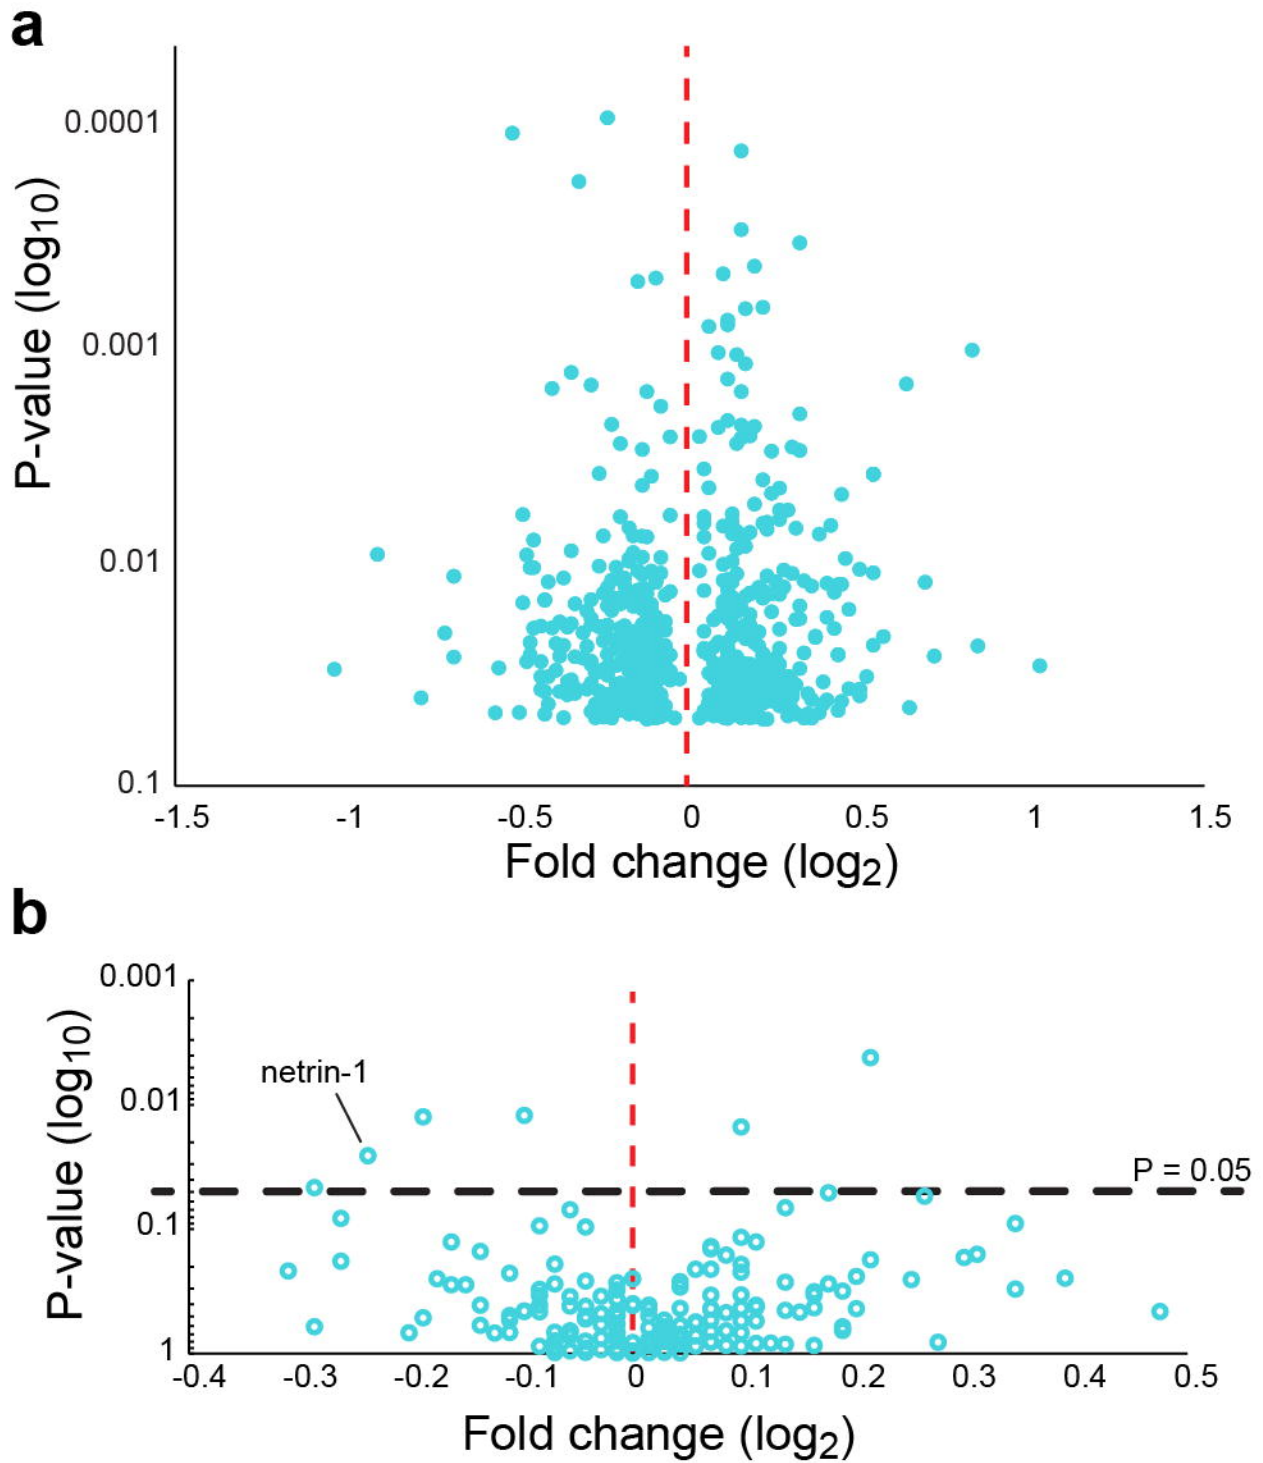

Fig. 5

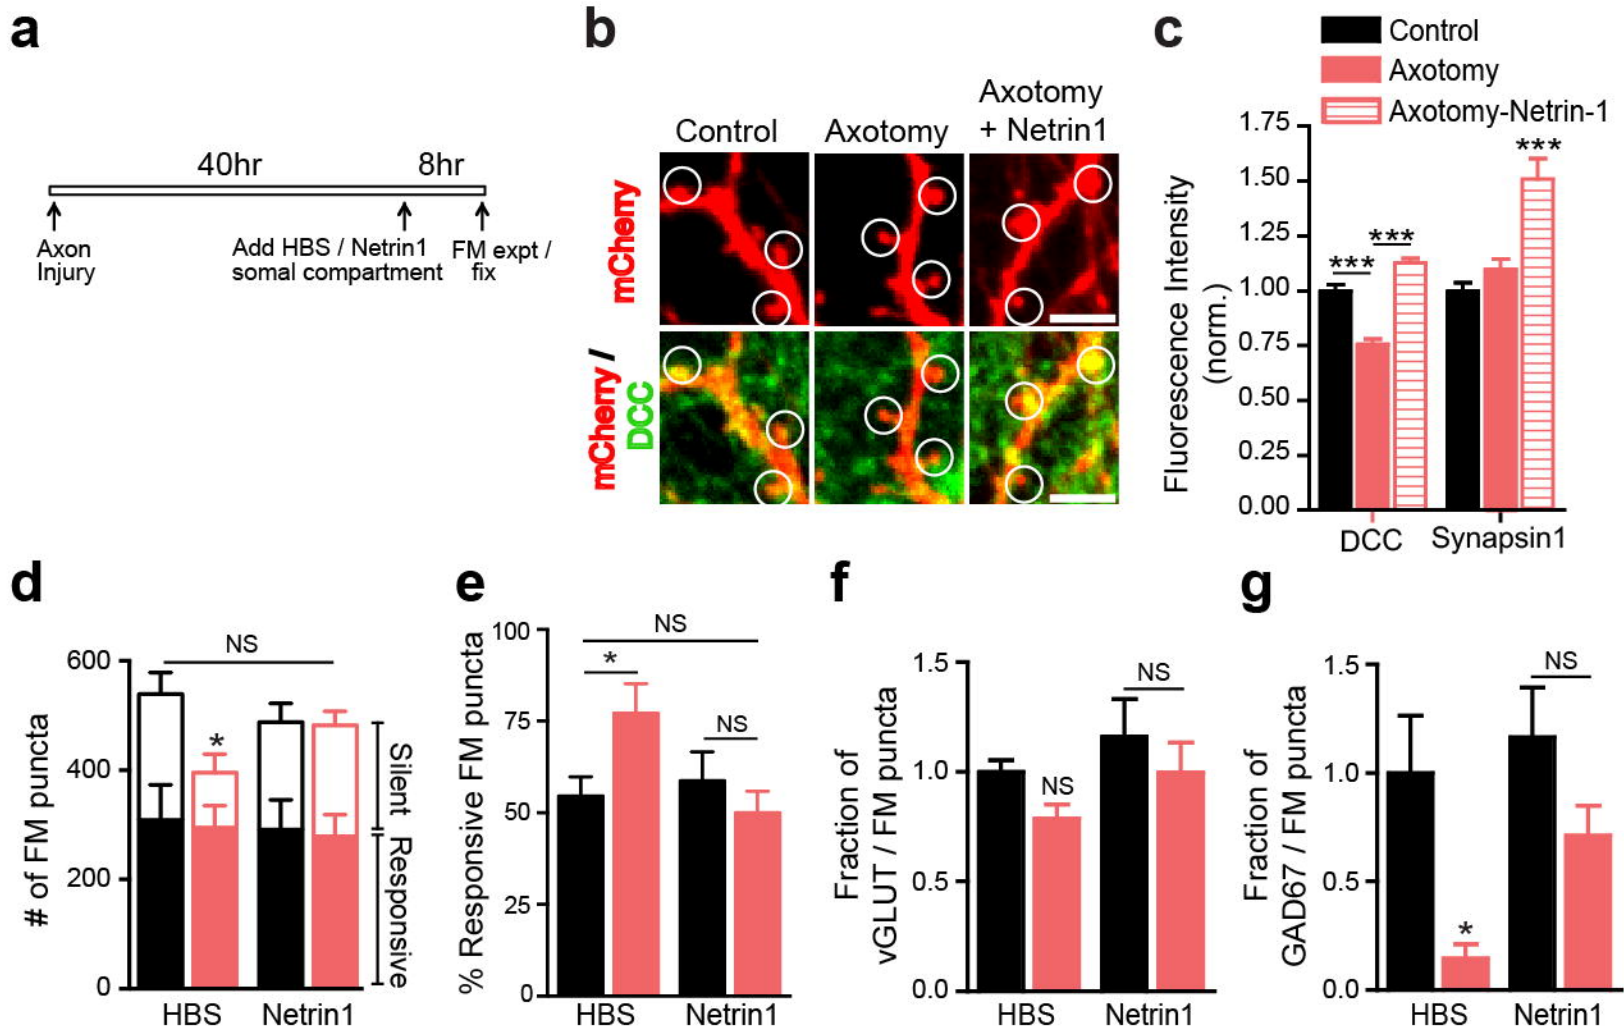

Fig. 6
